# Supplementary material for: Individual co-variation between viral RNA load and gene expression reveals novel host factors during early dengue virus infection of the Aedes aegypti midgut
Source: PubMed Central journal article supplement (PMC5752042; doi:10.1371/journal.pntd.0006152), 2017-12-19

**A**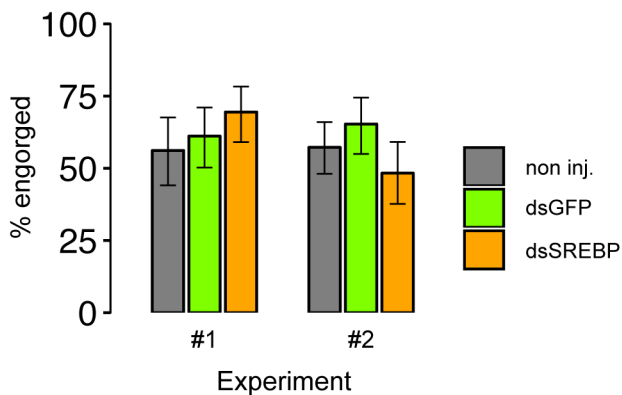**B**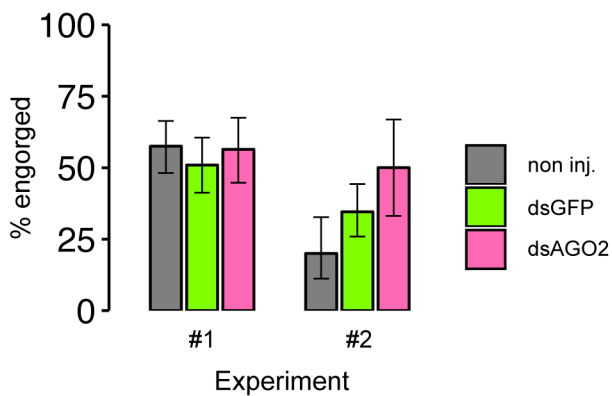**C**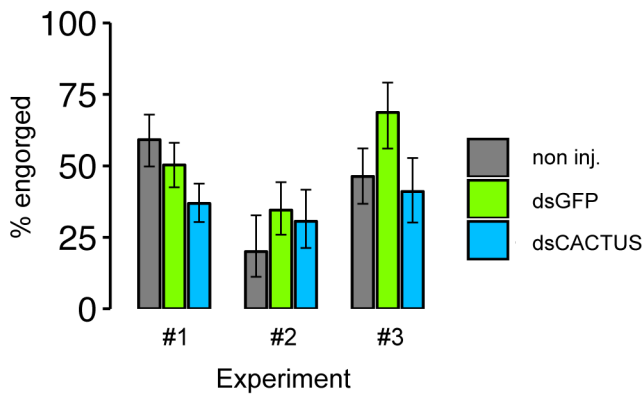

Supplement: pntd.0006152.s004.pdf [file pntd.0006152.s004.pdf]
